# Supplementary material for: Development and relative validation of a short food frequency questionnaire for assessing dietary intakes of non-alcoholic fatty liver disease patients
Source: Springer Nature journal article supplement (doi:10.1007/s00394-019-01926-5), 2019-02-25

The following questions ask about some foods & drinks you might have during a 'typical' week, over the past month or so. Do not be concerned if some things you eat or drink are not mentioned.

**Please tick how often you eat at least ONE portion of the following foods & drinks:** (a portion includes: a handful of grapes, an orange, a serving of carrots, a side salad, a slice of bread, a glass of pop).

(Please only put one tick, but answer **EVERY** line)

### 1. Carbohydrates

|      |                                                                               | Rarely or never          | Less than 1 a week       | Once a week              | 2-3 times a week         | 4-6 times a week         | 1-2 times a day          | 3-4 times a day          | 5+ a day                 |
|------|-------------------------------------------------------------------------------|--------------------------|--------------------------|--------------------------|--------------------------|--------------------------|--------------------------|--------------------------|--------------------------|
| 1.1  | Fruit - fresh and frozen                                                      | <input type="checkbox"/> | <input type="checkbox"/> | <input type="checkbox"/> | <input type="checkbox"/> | <input type="checkbox"/> | <input type="checkbox"/> | <input type="checkbox"/> | <input type="checkbox"/> |
| 1.2  | Fruit - tinned in syrup, dried                                                | <input type="checkbox"/> | <input type="checkbox"/> | <input type="checkbox"/> | <input type="checkbox"/> | <input type="checkbox"/> | <input type="checkbox"/> | <input type="checkbox"/> | <input type="checkbox"/> |
| 1.3  | Fruit juice (not cordial or squash)                                           | <input type="checkbox"/> | <input type="checkbox"/> | <input type="checkbox"/> | <input type="checkbox"/> | <input type="checkbox"/> | <input type="checkbox"/> | <input type="checkbox"/> | <input type="checkbox"/> |
| 1.4  | Salad (not garnish added to sandwiches)                                       | <input type="checkbox"/> | <input type="checkbox"/> | <input type="checkbox"/> | <input type="checkbox"/> | <input type="checkbox"/> | <input type="checkbox"/> | <input type="checkbox"/> | <input type="checkbox"/> |
| 1.5  | Vegetables (tinned/frozen/fresh but not potatoes)                             | <input type="checkbox"/> | <input type="checkbox"/> | <input type="checkbox"/> | <input type="checkbox"/> | <input type="checkbox"/> | <input type="checkbox"/> | <input type="checkbox"/> | <input type="checkbox"/> |
| 1.6  | Chips/fried potatoes                                                          | <input type="checkbox"/> | <input type="checkbox"/> | <input type="checkbox"/> | <input type="checkbox"/> | <input type="checkbox"/> | <input type="checkbox"/> | <input type="checkbox"/> | <input type="checkbox"/> |
| 1.7  | Potatoes, boiled, steamed, baked                                              | <input type="checkbox"/> | <input type="checkbox"/> | <input type="checkbox"/> | <input type="checkbox"/> | <input type="checkbox"/> | <input type="checkbox"/> | <input type="checkbox"/> | <input type="checkbox"/> |
| 1.8  | Beans or pulses like baked beans, chick peas, dahl                            | <input type="checkbox"/> | <input type="checkbox"/> | <input type="checkbox"/> | <input type="checkbox"/> | <input type="checkbox"/> | <input type="checkbox"/> | <input type="checkbox"/> | <input type="checkbox"/> |
| 1.9  | White bread, rolls                                                            | <input type="checkbox"/> | <input type="checkbox"/> | <input type="checkbox"/> | <input type="checkbox"/> | <input type="checkbox"/> | <input type="checkbox"/> | <input type="checkbox"/> | <input type="checkbox"/> |
| 1.10 | Brown bread, rolls                                                            | <input type="checkbox"/> | <input type="checkbox"/> | <input type="checkbox"/> | <input type="checkbox"/> | <input type="checkbox"/> | <input type="checkbox"/> | <input type="checkbox"/> | <input type="checkbox"/> |
| 1.11 | Fibre-rich breakfast cereal, like Weetabix, Fruit 'n' Fibre, Porridge, Muesli | <input type="checkbox"/> | <input type="checkbox"/> | <input type="checkbox"/> | <input type="checkbox"/> | <input type="checkbox"/> | <input type="checkbox"/> | <input type="checkbox"/> | <input type="checkbox"/> |

|      |                                                                                  | Rarely or never          | Less than 1 a week       | Once a week              | 2-3 times a week         | 4-6 times a week         | 1-2 times a day          | 3-4 times a day          | 5+ a day                 |
|------|----------------------------------------------------------------------------------|--------------------------|--------------------------|--------------------------|--------------------------|--------------------------|--------------------------|--------------------------|--------------------------|
| 1.12 | Breakfast Cereals (cornflakes, rice krispies)                                    | <input type="checkbox"/> | <input type="checkbox"/> | <input type="checkbox"/> | <input type="checkbox"/> | <input type="checkbox"/> | <input type="checkbox"/> | <input type="checkbox"/> | <input type="checkbox"/> |
| 1.13 | White rice, white pasta                                                          | <input type="checkbox"/> | <input type="checkbox"/> | <input type="checkbox"/> | <input type="checkbox"/> | <input type="checkbox"/> | <input type="checkbox"/> | <input type="checkbox"/> | <input type="checkbox"/> |
| 1.14 | Brown rice, brown pasta                                                          | <input type="checkbox"/> | <input type="checkbox"/> | <input type="checkbox"/> | <input type="checkbox"/> | <input type="checkbox"/> | <input type="checkbox"/> | <input type="checkbox"/> | <input type="checkbox"/> |
| 1.15 | Fizzy soft drinks e.g. coca cola, lemonade                                       | <input type="checkbox"/> | <input type="checkbox"/> | <input type="checkbox"/> | <input type="checkbox"/> | <input type="checkbox"/> | <input type="checkbox"/> | <input type="checkbox"/> | <input type="checkbox"/> |
| 1.16 | Low calorie or diet fizzy drinks, or squash, or cordial                          | <input type="checkbox"/> | <input type="checkbox"/> | <input type="checkbox"/> | <input type="checkbox"/> | <input type="checkbox"/> | <input type="checkbox"/> | <input type="checkbox"/> | <input type="checkbox"/> |
| 1.17 | Sweet biscuits, cakes, chocolate, sweets                                         | <input type="checkbox"/> | <input type="checkbox"/> | <input type="checkbox"/> | <input type="checkbox"/> | <input type="checkbox"/> | <input type="checkbox"/> | <input type="checkbox"/> | <input type="checkbox"/> |
| 1.18 | Ice cream/choc ice                                                               | <input type="checkbox"/> | <input type="checkbox"/> | <input type="checkbox"/> | <input type="checkbox"/> | <input type="checkbox"/> | <input type="checkbox"/> | <input type="checkbox"/> | <input type="checkbox"/> |
| 1.19 | Sugar added to tea/coffee/cereal (teaspoon)                                      | <input type="checkbox"/> | <input type="checkbox"/> | <input type="checkbox"/> | <input type="checkbox"/> | <input type="checkbox"/> | <input type="checkbox"/> | <input type="checkbox"/> | <input type="checkbox"/> |
| 1.20 | Crisps / savoury snacks                                                          | <input type="checkbox"/> | <input type="checkbox"/> | <input type="checkbox"/> | <input type="checkbox"/> | <input type="checkbox"/> | <input type="checkbox"/> | <input type="checkbox"/> | <input type="checkbox"/> |
| 1.21 | Tea (cup)                                                                        | <input type="checkbox"/> | <input type="checkbox"/> | <input type="checkbox"/> | <input type="checkbox"/> | <input type="checkbox"/> | <input type="checkbox"/> | <input type="checkbox"/> | <input type="checkbox"/> |
| 1.22 | Coffee, instant or ground (cup)                                                  | <input type="checkbox"/> | <input type="checkbox"/> | <input type="checkbox"/> | <input type="checkbox"/> | <input type="checkbox"/> | <input type="checkbox"/> | <input type="checkbox"/> | <input type="checkbox"/> |
| 1.23 | Coffee drink, made with flavoured syrups, e.g hazelnut latte, frappuccino, mocha | <input type="checkbox"/> | <input type="checkbox"/> | <input type="checkbox"/> | <input type="checkbox"/> | <input type="checkbox"/> | <input type="checkbox"/> | <input type="checkbox"/> | <input type="checkbox"/> |
| 1.24 | Cocoa, hot chocolate (cup)                                                       | <input type="checkbox"/> | <input type="checkbox"/> | <input type="checkbox"/> | <input type="checkbox"/> | <input type="checkbox"/> | <input type="checkbox"/> | <input type="checkbox"/> | <input type="checkbox"/> |

## 2. Protein

|                              |                                                                                                  | Rarely or never          | Less than 1 a week       | Once a week              | 2-3 times a week         | 4-6 times a week         | 7+ times a week          |
|------------------------------|--------------------------------------------------------------------------------------------------|--------------------------|--------------------------|--------------------------|--------------------------|--------------------------|--------------------------|
| <b>Whole meats:</b>          |                                                                                                  |                          |                          |                          |                          |                          |                          |
| 2.1                          | Beef, Lamb, Pork, Ham - steaks, roasts, joints, mince or chops                                   | <input type="checkbox"/> | <input type="checkbox"/> | <input type="checkbox"/> | <input type="checkbox"/> | <input type="checkbox"/> | <input type="checkbox"/> |
| 2.2                          | Chicken or Turkey – steaks, roasts, joints, mince or portions (not in batter or breadcrumbs)     | <input type="checkbox"/> | <input type="checkbox"/> | <input type="checkbox"/> | <input type="checkbox"/> | <input type="checkbox"/> | <input type="checkbox"/> |
| <b>Processed meats/meat:</b> |                                                                                                  |                          |                          |                          |                          |                          |                          |
| 2.3                          | Sausages, bacon, corned beef, meat pies/pasties, burgers                                         | <input type="checkbox"/> | <input type="checkbox"/> | <input type="checkbox"/> | <input type="checkbox"/> | <input type="checkbox"/> | <input type="checkbox"/> |
| 2.4                          | Chicken or Turkey - nuggets/twizzlers, turkey burgers, chicken pies, or in batter or breadcrumbs | <input type="checkbox"/> | <input type="checkbox"/> | <input type="checkbox"/> | <input type="checkbox"/> | <input type="checkbox"/> | <input type="checkbox"/> |
| <b>Fish:</b>                 |                                                                                                  |                          |                          |                          |                          |                          |                          |
| 2.5                          | White fish in batter or breadcrumbs – like 'fish 'n' chips'                                      | <input type="checkbox"/> | <input type="checkbox"/> | <input type="checkbox"/> | <input type="checkbox"/> | <input type="checkbox"/> | <input type="checkbox"/> |
| 2.6                          | White fish not in batter or breadcrumbs                                                          | <input type="checkbox"/> | <input type="checkbox"/> | <input type="checkbox"/> | <input type="checkbox"/> | <input type="checkbox"/> | <input type="checkbox"/> |
| 2.7                          | Oily fish – like herrings, sardines, salmon, trout, mackerel, fresh tuna (not tinned tuna)       | <input type="checkbox"/> | <input type="checkbox"/> | <input type="checkbox"/> | <input type="checkbox"/> | <input type="checkbox"/> | <input type="checkbox"/> |

## 3. Fat

|                        |                                                                 | Rarely or never          | Less than 1 a week       | Once a week              | 2-3 times a week         | 4-6 times a week         | 7+ times a week          |
|------------------------|-----------------------------------------------------------------|--------------------------|--------------------------|--------------------------|--------------------------|--------------------------|--------------------------|
| <b>Dairy Products:</b> |                                                                 |                          |                          |                          |                          |                          |                          |
| 3.1                    | Low fat yoghurt, fromage frais, flavoured yoghurt (125g carton) | <input type="checkbox"/> | <input type="checkbox"/> | <input type="checkbox"/> | <input type="checkbox"/> | <input type="checkbox"/> | <input type="checkbox"/> |
| 3.2                    | Full fat, Greek yoghurt, or natural yoghurt (125g carton)       | <input type="checkbox"/> | <input type="checkbox"/> | <input type="checkbox"/> | <input type="checkbox"/> | <input type="checkbox"/> | <input type="checkbox"/> |
| 3.3                    | Cheese, e.g. cheddar, brie, edam (medium serving)               | <input type="checkbox"/> | <input type="checkbox"/> | <input type="checkbox"/> | <input type="checkbox"/> | <input type="checkbox"/> | <input type="checkbox"/> |
| 3.4                    | Cottage cheese, low fat soft cheese (medium serving)            | <input type="checkbox"/> | <input type="checkbox"/> | <input type="checkbox"/> | <input type="checkbox"/> | <input type="checkbox"/> | <input type="checkbox"/> |

|                 |                                                                                  | Rarely or never          | Less than 1 a week       | Once a week              | 2-3 times a week         | 4-6 times a week         | 7+ times a week          |
|-----------------|----------------------------------------------------------------------------------|--------------------------|--------------------------|--------------------------|--------------------------|--------------------------|--------------------------|
| <b>Spreads:</b> |                                                                                  |                          |                          |                          |                          |                          |                          |
| 3.5             | Butter (teaspoon)                                                                | <input type="checkbox"/> | <input type="checkbox"/> | <input type="checkbox"/> | <input type="checkbox"/> | <input type="checkbox"/> | <input type="checkbox"/> |
| 3.6             | Block margarine e.g. stork (teaspoon)                                            | <input type="checkbox"/> | <input type="checkbox"/> | <input type="checkbox"/> | <input type="checkbox"/> | <input type="checkbox"/> | <input type="checkbox"/> |
| 3.7             | Polyunsaturated margarine (tub) eg Flora, Dairygold, sunflower spread (teaspoon) | <input type="checkbox"/> | <input type="checkbox"/> | <input type="checkbox"/> | <input type="checkbox"/> | <input type="checkbox"/> | <input type="checkbox"/> |
| 3.8             | Other soft margarine, dairy spreads (tub) e.g Low Low, Connaught Gold (teaspoon) | <input type="checkbox"/> | <input type="checkbox"/> | <input type="checkbox"/> | <input type="checkbox"/> | <input type="checkbox"/> | <input type="checkbox"/> |
| 3.9             | Salad cream/mayonnaise                                                           | <input type="checkbox"/> | <input type="checkbox"/> | <input type="checkbox"/> | <input type="checkbox"/> | <input type="checkbox"/> | <input type="checkbox"/> |

#### 4. Are there any other foods which you ate more than once a week?

Yes  No  (If yes, please list below)

| Food | Usual Serving | No of times eaten each week |
|------|---------------|-----------------------------|
|      |               |                             |
|      |               |                             |
|      |               |                             |

#### 5. On average, how many portions of FRUIT do you eat a day?

(examples include: a handful of grapes, an orange, a handful of dried fruits)

#### 6. On average, how many portions of VEGETABLES do you eat a day?

(examples include: 3 heaped tablespoons of carrots, a side salad, 2 spears of broccoli)

#### 7. What milk do you usually use or drink, such as in hot & cold drinks or on cereal?

(including tea, coffee, hot milk, milk shakes, or on cereal)

|                        |                          |                       |                          |
|------------------------|--------------------------|-----------------------|--------------------------|
| Whole/ Full-fat milk   | <input type="checkbox"/> | Semi-skimmed milk     | <input type="checkbox"/> |
| Skimmed milk           | <input type="checkbox"/> | Rarely/never use milk | <input type="checkbox"/> |
| Other (please specify) |                          |                       |                          |

#### 8. How often did you eat takeaway foods such as pizza/curries/fish and chips?

|                  |                          |                       |                          |
|------------------|--------------------------|-----------------------|--------------------------|
| Daily            | <input type="checkbox"/> | 1-3 times a week      | <input type="checkbox"/> |
| 4-6 times a week | <input type="checkbox"/> | Less than once a week | <input type="checkbox"/> |
| Never            | <input type="checkbox"/> |                       |                          |

### 9. What type of fat did you most often use for frying, roasting, grilling etc?

|                                                          |                          |                                    |                          |
|----------------------------------------------------------|--------------------------|------------------------------------|--------------------------|
| Butter                                                   | <input type="checkbox"/> | Lard/dripping                      | <input type="checkbox"/> |
| Vegetable oil<br>please specify, e.g. corn,<br>sunflower | <input type="checkbox"/> | Solid vegetable fat (cisco, stork) | <input type="checkbox"/> |
| Margarine                                                | <input type="checkbox"/> | None                               | <input type="checkbox"/> |

### 10. How often did you eat food that was fried at home?

|                  |                          |                       |                          |
|------------------|--------------------------|-----------------------|--------------------------|
| Daily            | <input type="checkbox"/> | 1-3 times a week      | <input type="checkbox"/> |
| 4-6 times a week | <input type="checkbox"/> | Less than once a week | <input type="checkbox"/> |
| Never            | <input type="checkbox"/> |                       |                          |

### 11. On average, how much alcohol do you drink over a complete seven day week?

One standard drink is 10g of alcohol, which equals 1 small glass of wine (100ml of 12.5%ABV), half a pint of beer, lager, or stout (284ml), a pub measure of spirits (35.5ml).  
See photos for guide

|                                      |                          |                              |                          |
|--------------------------------------|--------------------------|------------------------------|--------------------------|
| I rarely/never drink alcohol         | <input type="checkbox"/> | Less than 11 standard drinks | <input type="checkbox"/> |
| Between 11 and 17<br>standard drinks | <input type="checkbox"/> | More than 17 standard drinks | <input type="checkbox"/> |

**Thank you**

Courtesy of Drink Aware

[www.drinkaware.ie](http://www.drinkaware.ie)

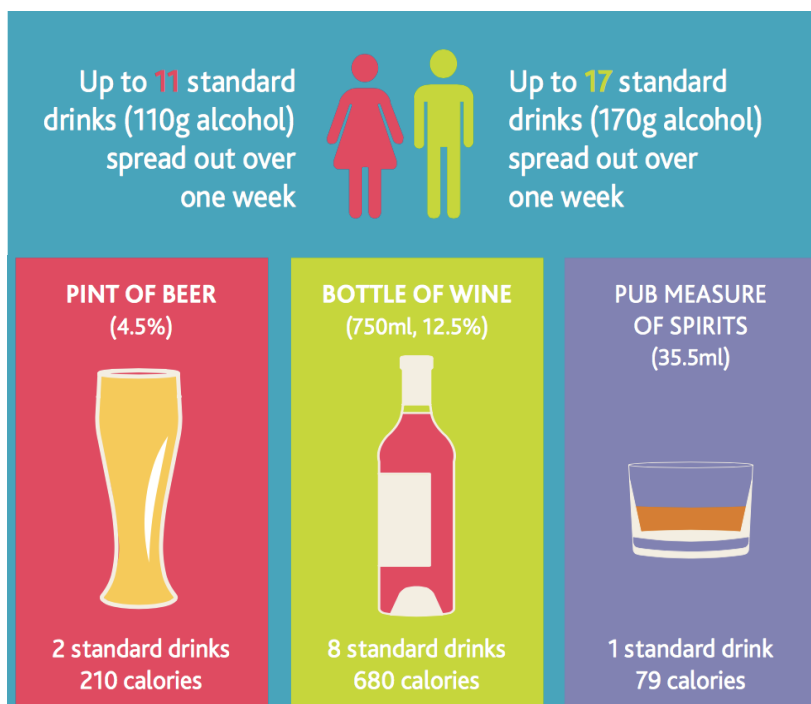

Supplement: MOESM1 [file 16506086]
